# Supplementary material for: SPAs promote thermomorphogenesis via regulating the phyB-PIF4 module in Arabidopsis
Source: Oxford University Press journal article supplement (doi:10.1242/dev.189233), 2020-01-01
Supplement: dev189233supp.pdf [file dev189233supp.pdf]

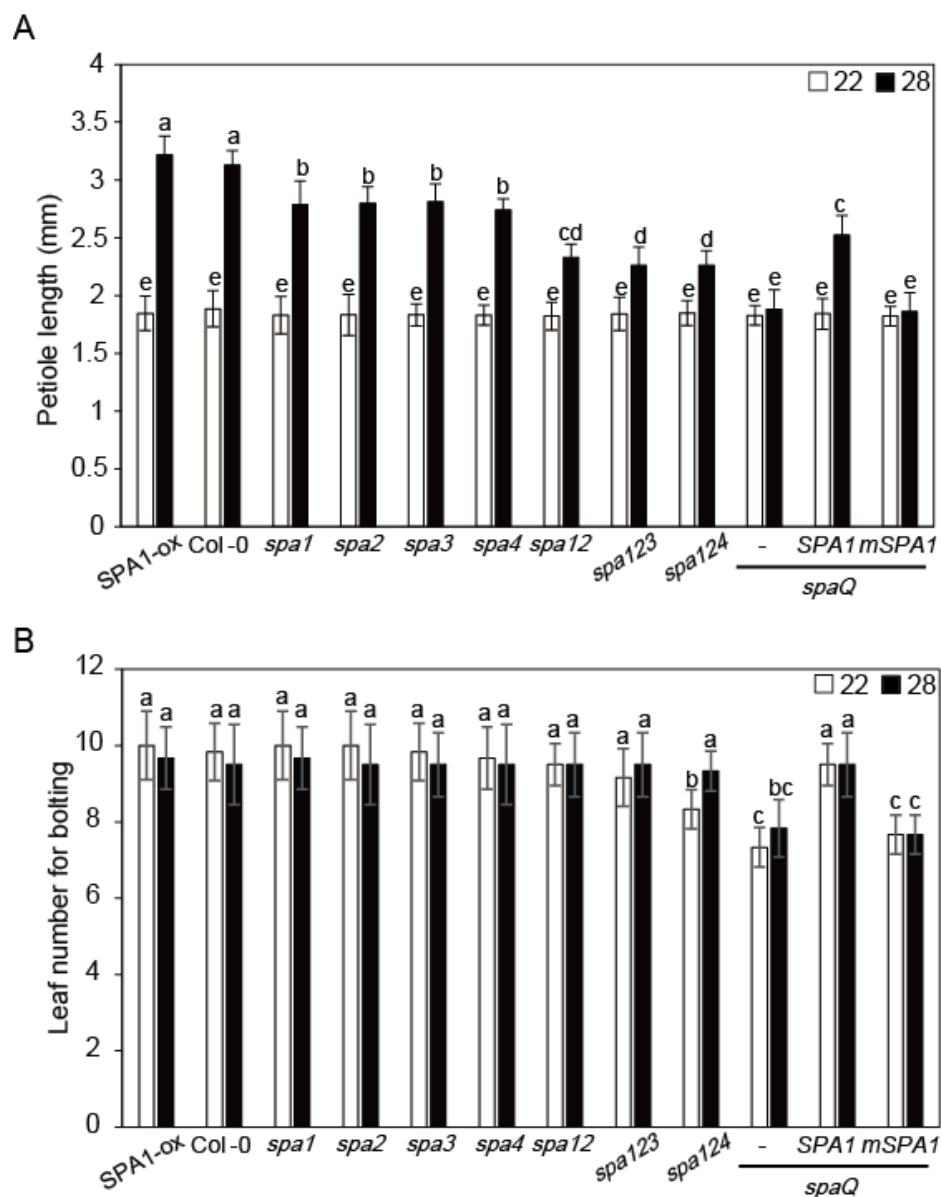

**Figure S1: Petiole length and leaf number of *spa* mutants.**

Bar graphs show the petiole lengths (A) or leaf number for bolting (B) using *spa* mutants grown under 22 or 28°C. Leaf number for bolting was measured in LD (16L:8D) condition. SPA1-ox refers to *35S:TAP-SPA1*. Three *spaQ* background plants are indicated with - for *spaQ*, SPA1 for *35S:LUC-SPA1/spaQ*, and mSPA1 for *35S:LUC-mSPA1/spaQ*, respectively. The letters a-e indicate statistically significant differences between means of petiole lengths (A) or leaf number (B) ( $P < 0.05$ ) based on one-way ANOVA analyses with Tukey's HSD test. Error bars indicate s.d. ( $n=3$ ).

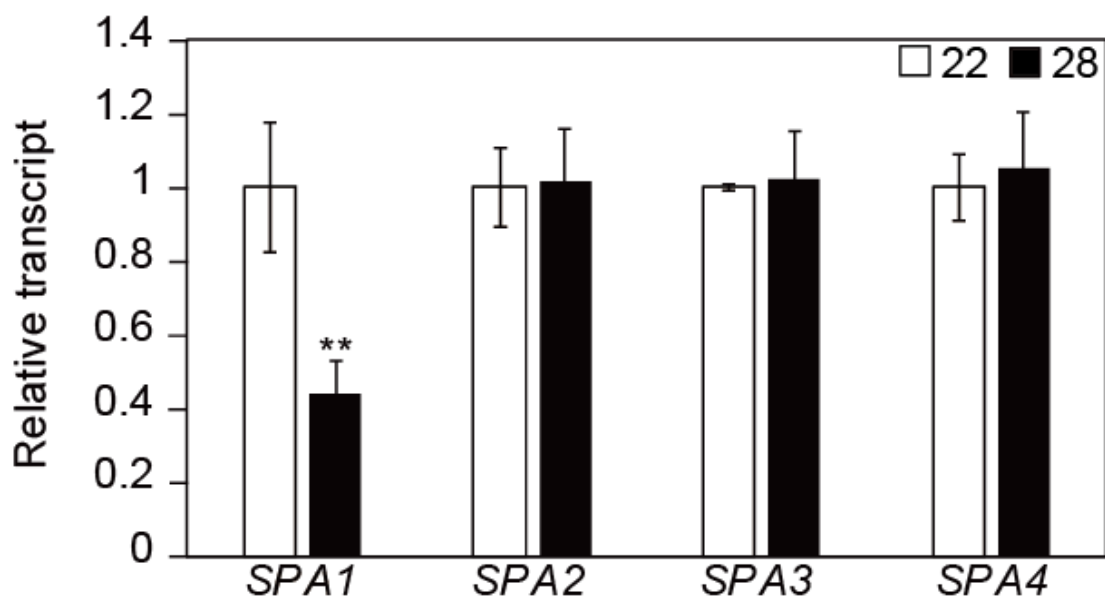

**Figure S2: Relative transcript level of SPAs.**

qPCR was performed to detect 4 SPAs transcriptional level. Samples were from Col-0 whole seedling grown for 5 days in 22°C and transferred to 22°C or 28°C for 4 hours. Three biological replicates were used in this study. Relative gene expression levels were normalized using expression levels of *ACT7*. Asterisks indicate statistical difference using Student's t-test; \*\* $p < 0.01$ .

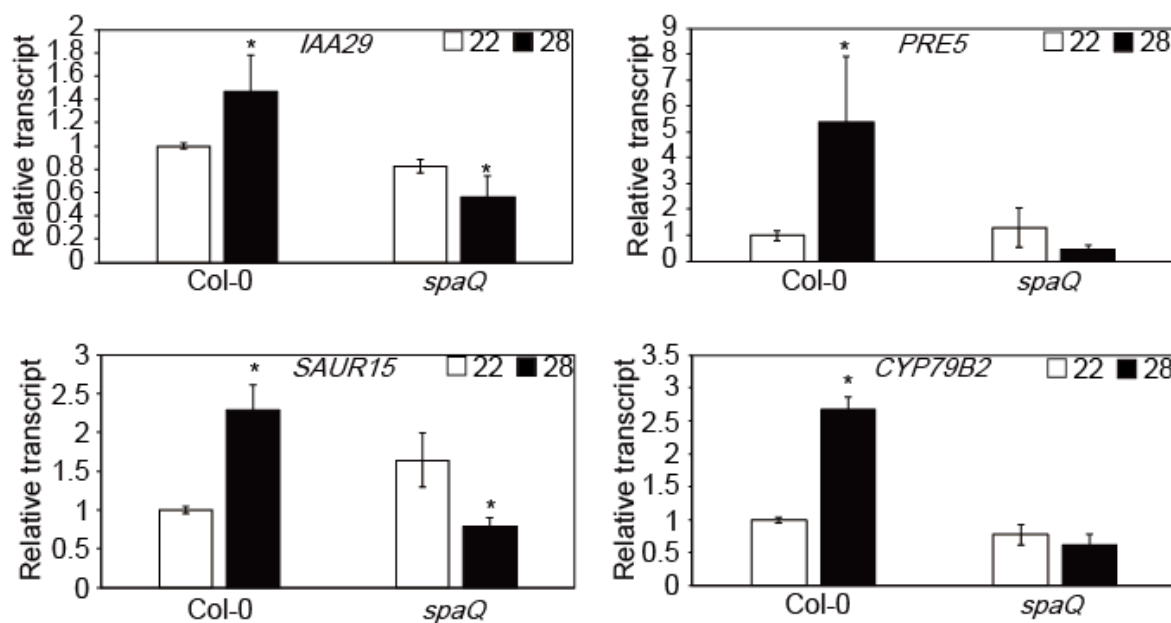

**Figure S3: Relative transcript level of thermo-responsive genes.**

qPCR was performed to detect transcriptional level of *IAA 29*, *PRE 5*, *SAUR 15*, and *CYP79B2*. Samples were from *Col-0* or *spaQ* mutant whole seedling grown for 5 days in 22°C and transferred to 22°C or 28°C for 4 hours. Three biological replicates were used in this study. Relative gene expression levels were normalized using expression levels of *ACT7*. Asterisks indicate statistical difference using Student's t-test; \*p < 0.05.

A

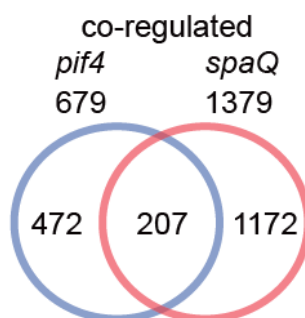

B

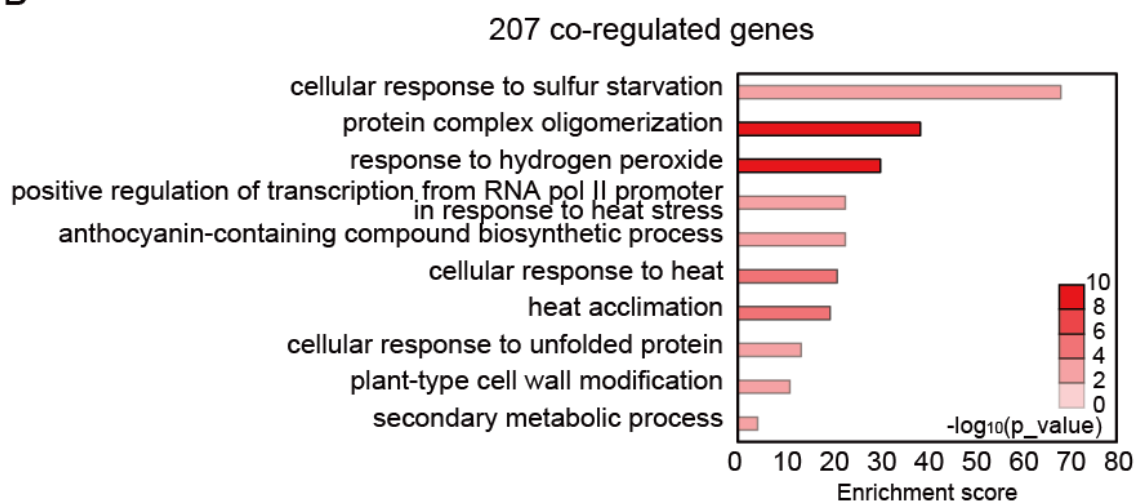

**Figure S4: SPAs and PIF4 share co-regulated genes at high ambient temperature.**

(A) Venn diagrams show co-regulated genes in *pif4* vs *spaQ* mutant at high ambient temperature response. (B) Gene Ontology (GO) analysis of 207 co-regulated genes. DEGs from *pif4* were derived from Ding et al., 2018. *spaQ* were grown under constant light condition (22°C and 28°C for 24 hr) whereas *pif4* were grown under long day condition (22°C and 29°C for 24 hr).

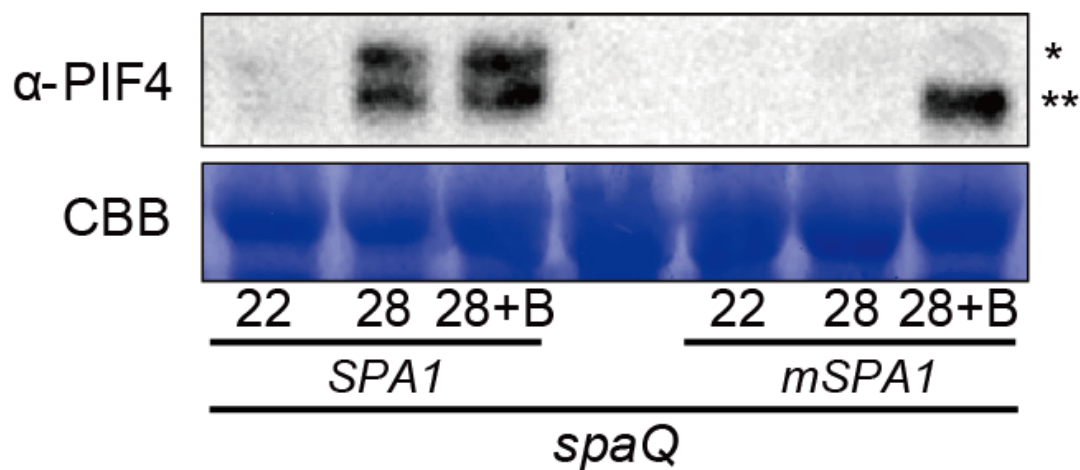

**Figure S5: Relative expression level of *PIF4***

Proteasome inhibitor treatment experiment using *spaQ* transgenic lines. Three *spaQ* background plants are indicated with blank for *spaQ*, *SPA1* for *35S:LUC-SPA1/spaQ*, and *mSPA1* for *35S:LUC-mSPA1/spaQ*, respectively. B stands for bortezomib. Single asterisk (\*) shows phosphorylated form and double asterisks (\*\*) show unphosphorylated form.

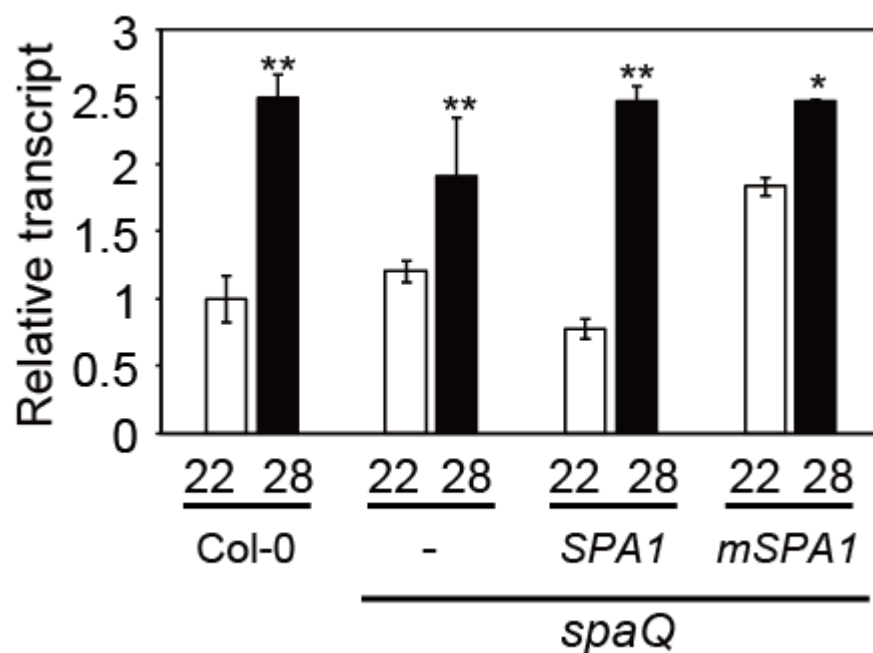

**Figure S6: Relative expression level of *PIF4***

Transcription level of *PIF4* using qPCR analysis. qPCR samples were from Col-0, *spaQ*, *35S:SPA1-LUC/spaQ*, and *35S:mSPA1-LUC/spaQ* whole seedling grown for 5 days in 22°C and transferred to 22°C or 28°C for additional 24 hours. Three biological repeats were performed. Relative gene expression levels were normalized using expression levels of *ACT7*. Asterisks indicate statistical difference using Student's t-test; \* $p < 0.05$ , \*\* $p < 0.01$ .

Table S1: primers used in this study.

| Oligonucleotides                                          |                       |
|-----------------------------------------------------------|-----------------------|
| <i>SPA1-F</i> AGGGCTGGCAAGTTTGAGCAT                       | {Gangappa, 2017 #677} |
| <i>SPA1-R</i> ACAAATTCAGGAGGAGTTTCC                       | {Gangappa, 2017 #677} |
| <i>SPA2-F</i> ACAAATGAGGTTTATGCCTATCACC                   | This study            |
| <i>SPA2-R</i> CATATTCGATCTTTTTCTCCAGCAA                   | This study            |
| <i>SPA3-F</i> GAGACTAACGAGGTTTTTCGTGTACC                  | This study            |
| <i>SPA3-R</i> CGTAGACGACTGTCCTCGCCAGCAG                   | This study            |
| <i>SPA4-F</i> ACTATAGACCCTGTGTCGGAACCTCG                  | This study            |
| <i>SPA4-R</i> AACTAAGGTCGACGACTGTCCCCGC                   | This study            |
| <i>SAUR20-F</i> AACTTGAATCTTTTCATACATCTTCAGAAGA           | {Franklin, 2011 #410} |
| <i>SAUR20-R</i> TAACTAGGAAGAAAAATGTTGGCTCATC              | {Franklin, 2011 #410} |
| <i>At4g33720-F</i> GACGAGCAATTTGACTACGATTATG              | This study            |
| <i>At4g33720-R</i> GTTGCAAGTGATAAAGGTTTGACCA              | This study            |
| <i>At1g09380-F</i> GAAGAGAACTCTACACCGGCACGT               | This study            |
| <i>At1g09380-R</i> TTCACTCTTGACTTTATGGTTTTGT              | This study            |
| <i>IAA29-F</i> ATAGCAAGAAAAGTGGATATCAAGC                  | This study            |
| <i>IAA29-R</i> AAGTAGCCAGTCACCCTCTTCCCT                   | This study            |
| <i>PRE5-F</i> AACGGCGTCGTTCTGATAAG                        | {Oh, 2012 #421}       |
| <i>PRE5-R</i> CATGAGTAAGCTTCTAATCACGG                     | {Oh, 2012 #421}       |
| <i>SAUR15-F</i> AAGAGGATTCATGGCGGTCTATG                   | {Oh, 2012 #421}       |
| <i>SAUR15-R</i> GTATTGTTAAGCCGCCATTGG                     | {Oh, 2012 #421}       |
| <i>CYP79B2-F</i> AGTACCGGGAAAAGAGGTTGTGCGG                | This study            |
| <i>CYP79B2-R</i> CAGAAACATATCGTGACTAGACTCC                | This study            |
| <i>ACT7-F</i> TCCATGAAACAACCTTACAACCTCCATCA               | {Sun, 2013 #739}      |
| <i>ACT7-R</i> CATCGTACTCACTCTTTGAAATCCACA                 | {Sun, 2013 #739}      |
| <i>LexA-PIF4-F</i><br>AAAAGAATTCAAATGGAACACCAAGGTTGGAGTTT | This study            |
| <i>LexA-PIF4-R</i><br>AAAACCTCGAGCTAGTGGTCCAAACGAGAACCGT  | This study            |

Table S2. Antibodies used in this study.

| Antibody               | source                     | Catalog number |
|------------------------|----------------------------|----------------|
| Anti-Myc               | Cell signaling             | #2276S         |
| Anti-phyB              | Dr. Peter Quail            | N/A            |
| Anti-MBP               | New England Biolabs        | E8032S         |
| Anti-GST-HRP conjugate | GE Healthcare Bio-Sciences | RPN1236        |
| ChIP grade Anti-Myc    | Abcam                      | Ab32           |
| Anti-GFP               | Abcam                      | ab6556         |
| Anti-GFP               | Thermo Fisher Scientific   | A11120         |
| Anti-PIF4              | Agrisera                   | AS12 1860      |
| Anti-LUC               | Thermofisher               | A11120         |
